# Supplementary material
Source: Research Square preprint supplement (doi:10.21203/rs.3.rs-10194584/v1)
Supplement: Supplementary file 1 [file ad8a6d4a204b017daee5ae25.pdf]

1 **Supplementary material for:**

2  
3 **Astroglial noradrenaline shapes cerebellar synaptic integration**  
4 **and motor adaptation**

5  
6 Sambre Mach, Juliette Royer, Wenli Niu, Xia Li, Rafael Benzi, Nathalie Desvignes, Julien Bouvier,  
7 Micaela Galante\*<sup>✉</sup> & Glenn Dallérac\*<sup>✉</sup>

8  
9 Institut des Neurosciences Paris-Saclay, Université Paris-Saclay, CNRS UMR9197, 91400, Saclay,  
10 France.

11  
12 \* Equal contribution

13  
14 ✉ [glenn.dallerac@cnrs.fr](mailto:glenn.dallerac@cnrs.fr), [micaela.galante@universite-paris-saclay.fr](mailto:micaela.galante@universite-paris-saclay.fr)

15  
16 **Materials and Methods**

17  
18 Animal models

19 Experiments were conducted on male and female mice between postnatal day 60 (P60) and P90,  
20 in accordance with the European Community Council Directives of 1 January 2013 (2010/63/EU) and  
21 with the approval of the local animal welfare committee (certificate B 91 272 108). Animals were housed  
22 in a temperature-controlled environment (25 °C) under a 12 h light/dark cycle. All mouse lines were  
23 maintained on a C57BL/6J genetic background. When no sex differences were observed, data from male  
24 and female mice were pooled for analysis. Several transgenic lines were used in this study. The  
25 ALDH1L1-EGFP line expresses the enhanced green fluorescent protein (EGFP) under the control of the  
26 astrocyte-specific Aldh1l1 promoter. The aVMAT2cKO mice were kindly provided by Paola Bezzi  
27 (University of Lausanne) and generated by crossing the GFAPcre<sup>ERT2</sup> line expressing a tamoxifen  
28 (TAM) inducible cre recombinase transgene driven by the astrocytic glial fibrillary acidic protein  
29 (GFAP) promoter with the VMAT2<sup>lox/lox</sup> line containing cre-excisable loxP sequences in the endogenous  
30 VMAT2<sup>1,2</sup>. Recombination was induced by intraperitoneal injections of tamoxifen (100 mg/kg) for five  
31 consecutive days, animals were used after a minimum of 10 days after the first injection. Finally, DBH-  
32 cre mice were kindly gifted by Bruno Giros (Paris Cité University) and express the cre recombinase  
33 transgene under the dopamine-beta-hydroxylase (DBH) promoter.

34  
35 Immunohistochemistry

36 Mice were deeply anesthetized with Dolethal and transcardially perfused with iced-cold  
37 buffered saline (PBS) for exsanguination and with a 4% paraformaldehyde in PBS solution for fixation  
38 composed of (in mM): 35.4 NaH<sub>2</sub>PO<sub>4</sub>\*2H<sub>2</sub>O, 160.7 Na<sub>2</sub>HPO<sub>4</sub>\*2 H<sub>2</sub>O, 154 NaCl, pH 7.4. Brains were  
39 removed and post-fixed overnight at 4°C, then equilibrated with 30% sucrose at 4°C and frozen for  
40 storage at -20°C until immunohistochemistry. Sagittal 35µm thick cerebellar slices were collected using  
41 a cryostat. Brain slices were washed with PBS, permeabilized with 0.5% Triton X-100 and labeled with  
42 primary antibodies overnight at 4°C. Primary antibodies included: rabbit anti-VMAT2 (1/500, Synaptic  
43 Systems), rabbit anti-OCT3 (1/500, Gentauro), mouse anti-NET (1/500, ALOMONE AMT-002), rabbit  
44 anti-DAT (1/500, ABCAM AB184451), rabbit anti-DBH (1/500, ABCAM AB209487), mouse anti-  
45 calbindin (1/1000; Merck C9848), mouse anti-GS (1/500, Merck MABN543), rabbit anti-TH (1/500,  
46 ABCAM AB152), mouse anti-COMT (1/400, BD Biosciences #611970). Following primary antibody  
47 incubation, slices were washed twice with PBS before incubation with the appropriate secondary  
48 antibody for 2h at room temperature with the following secondary antibodies: goat anti-rabbit 555  
49 (1/1000, Thermofischer Scientific #A-21428), goat anti-mouse 488 (1/1000, Thermofischer Scientific

50 #A-11001), goat anti-rabbit 647 (1/1000, Thermofischer Scientific #A-21245). Slices were then washed  
51 twice with PBS and once with PB (in mM: 35.4 NaH<sub>2</sub>PO<sub>4</sub>\*2H<sub>2</sub>O, 160.7 Na<sub>2</sub>HPO<sub>4</sub>\*2 H<sub>2</sub>O) before being  
52 mounted in fluoromount (Thermofischer Scientific #18744094). Slices were observed under a confocal  
53 Leica SP8 microscope with x10 (0.4 NA), x25 (0.95 NA) and x40 (1.3 NA) objectives. Images were  
54 acquired at 12 bit with identical laser power and PMT settings and analyzed with ImageJ and LasX  
55 softwares. NE staining (1/500, Immusmol #IS1028) was performed using the STAINperfect  
56 Immunostaining kit (ImmuSmol #SP-A-1000, Bordeaux, France), following the manufacturer's  
57 protocol: mice were anesthetized and transcardially perfused with a combination of ice-cold 2%  
58 paraformaldehyde and the ImmuSmol fixation solution. Coronal and sagittal 35µm slices were collected  
59 with a cryostat (free-floating) and immunostaining was performed according to ImmuSmol protocol.  
60 Immunostainings were quantified as the proportion of cells identified by Purkinje cell or astrocytic  
61 markers that expressed the target protein.

62

### 63 Magnetic-activated cell sorting (MACS) isolation of astrocytes

64 Mice were deeply anesthetized with isoflurane and euthanized by cervical dislocation. The  
65 cerebellar vermis was rapidly dissected for astrocyte isolation and enzymatically dissociated at 37 °C  
66 for 30 minutes with the Miltenyi Adult Brain Dissociation Kit (130-107-677, Miltenyi Biotech, France)  
67 with gentle trituration every 10 minutes to obtain a single-cell suspension. After filtration through a  
68 through a 70 µm SmartStrainer, cells were pelleted by centrifugation (300 × g, 10 minutes, 4 °C) and  
69 resuspended in PBS + 0.5 % BSA. Fc receptors were blocked with the accompanying FcR Blocking  
70 Reagent, then cells were labeled with Anti-ACSA-2 MicroBeads (130-097-678, Miltenyi Biotech,  
71 France) for 15 minutes at 4 °C and loaded onto magnetic selection (MS) columns for positive selection.  
72 MS columns were washed twice with PBS + 0.5 % BSA and ACSA-2<sup>+</sup> astrocytes eluted in 500 µL  
73 sorting buffer. For each genotype (WT and aVMAT2cKO), astrocytes isolated from five mice were  
74 pooled, counted on an automated cell counter (DeNovix, France), and pelleted by centrifugation (300 x  
75 g, 5 minutes).

76

### 77 Protein quantification by automated capillary immunoassay

78 Cell pellets obtained with the MACS isolation of astrocytes were lysed in 100 µL buffer  
79 containing protease and phosphatase inhibitors. Lysates were then incubated on ice for 20 minutes with  
80 intermittent mixing and cleared by centrifugation (5000 × g, 15 min, 4 °C). Protein concentrations were  
81 determined by Bradford assay (Bio-Rad). Capillary immunoassays were then performed with an  
82 “automated western blot system” (WES, ProteinSimple, BioTechne) using the 12-230 kDa Separation  
83 Module combined to either the anti-rabbit (#DM-001) or anti-mouse (#DM-00) detection modules  
84 depending on the primary antibody. This automated capillary immunodetection delivers antibody-based  
85 separation and quantification equivalent to a classical Western blot, with improved throughput and  
86 precision. Protein concentration in supernatants of isolated astrocytes was first determined by Bradford  
87 assay (Bio-Rad), adjusted to 1 µg/ml in sample buffer provided in the separation module and processed  
88 according to the protocol provided by the manufacturer. A six point calibration curve was included to  
89 determine the optimal antibody concentration for reliable and quantitative detection. Data analysis was  
90 performed using the SimpleWes software, by verifying molecular-weight markers and peak assignment.  
91 The area under the curve (AUC) for each peak was exported in excel for subsequent statistical analysis.

92

### 93 Surgery

#### 94 *Stereotaxic injections of AAVs*

95 Mice anesthesia was induced with 4% isoflurane in 100% O<sub>2</sub>, and maintained with 1-1.5%  
96 isoflurane. Body temperature was monitored and maintained at 37°C during the whole procedure. The  
97 scalp was shaved and sterilized with betadine and 70% alcohol before an incision was made followed  
98 by drilling to access the skull. Intracerebral injections were achieved using a glass pipette connected to

99 a syringe pump (Legato 130, KD Scientific). Viruses were delivered at a rate of 0.05-0.1  $\mu\text{L}/\text{min}$ . Virus  
100 capillary was slowly removed after three minutes post-injection.

101 For the combined expression of the GRAB<sub>NE2h</sub> sensor and the excitatory DREADD in WT mice,  
102 500 nL of AAV9-hSyn-GRAB<sub>NE2h</sub>-GFP (WZ Biosciences Inc,  $2.76 \times 10^{13}$  GC/ml) and 500 nL AAV5-  
103 GFAP-hM3Dq-mCherry (Addgene, #50478,  $1.8 \times 10^{13}$  GC/ml) viruses were injected in lobule VI of the  
104 cerebellum (AP: -6.96 mm, ML: 0.0 mm, DV: -0.40 mm). AAV8-Pcp2-hM3Dq-mCherry viral vectors  
105 ( $> 4.0 \times 10^{13}$  GC/ml) allowing specific excitatory hM3Dq expression in PC were provided by Viral  
106 Vector Core (University of Minnesota) and co-injected with the GRAB<sub>NE2h</sub> sensor mentioned above  
107 following the same protocol. DBH-Cre mice were bilaterally injected with 200 nL of AAV9-hSyn-DIO-  
108 hM4D(Gi)-mCherry (Addgene, #44362,  $2.5 \times 10^{13}$  GC/ml) viral vectors in the LC (AP: -5.45 mm,  
109 ML: = +/-0.85 mm, DV = -3.65 mm) for expression of hM4Di DREADD in NE neurons. CalEx viruses  
110 (AAV5-gfaABC1D-mCherry-hPMCA2w/b, Addgene #111568,  $8.9 \times 10^{12}$  GC/ml) were co-injected with  
111 GFAP-hM3Dq and either GCaMP6f (AAV5-gfaABC1D-lck-GCaMP6f, Addgene #52924,  $2.5 \times 10^{13}$   
112 GC/ml) or GRAB<sub>NE2h</sub> in a total volume of 1  $\mu\text{L}$ . All animals were used 3 to 4 weeks after injection.

113

#### 114 *Cranial window and baseplate implantation*

115 For in vivo imaging, a 3 mm diameter circular craniotomy was made above the cerebellar vermis (AP:  
116 -6.5 to -7.0 mm; ML: 0.0 mm from Bregma). Three injections of GRAB<sub>NE2h</sub> virus (300 nL each) in the  
117 vermis were performed before the craniotomy was sealed with a sterile glass coverslip (3 mm diameter,  
118 #1 thickness), fixed using surgical glue and by dental cement. Mice were allowed to recover for one  
119 week. Subsequently, a miniscope-compatible baseplate (Inscopix) was implanted above the cranial  
120 window using dental cement to allow miniscope fixation. Mice were then allowed to recover for an  
121 additional 2 weeks before starting imaging sessions.

122

#### 123 Preparation of ex vivo cerebellar slices

124 Mice at P60-P80 were deeply anesthetized with isoflurane and sacrificed. The cerebellar vermis  
125 was collected after removal of the brain and placed in cold (4°C), oxygenated (95% O<sub>2</sub> + 5% CO<sub>2</sub>)  
126 cutting artificial cerebrospinal fluid (cutting ACSF, in mM: 110 NaCl, 5 KCl, 2.5 CaCl<sub>2</sub>, 1.5 MgSO<sub>4</sub>,  
127 1.24 KH<sub>2</sub>PO<sub>4</sub>, 10 D-glucose, 27.4 NaHCO<sub>3</sub>, 0.05 D-AP5). The vermis was then sagittally cut at 250  $\mu\text{m}$   
128 using a vibrating blade microtome (650HV, Microm France) for whole-cell patch clamp recordings, and  
129 at 400  $\mu\text{m}$  for two-photon imaging. Slices were then transferred to room temperature recording ACSF  
130 (in mM: 110 NaCl, 5 KCl, 2.5 CaCl<sub>2</sub>, 1.5 MgSO<sub>4</sub>, 1.24 KH<sub>2</sub>PO<sub>4</sub>, 10 D-glucose, 27.4 NaHCO<sub>3</sub>) and  
131 allowed to recover for 1h prior to recordings.

132

#### 133 Electrophysiological recordings

134 Individual slices were transferred to a submerged chamber mounted on a fixed-stage Scientifica  
135 SliceScope Pro 1000 electrophysiology microscope. Slices were continuously perfused with oxygenated  
136 ACSF maintained at 30-32°C with a temperature controller managed by the LinLab software  
137 (Scientifica), with a flow rate of 2mL/min. Signals were acquired with a MultiClamp 700B amplifier  
138 (Molecular Devices) filtered at 1 kHz and recordings were obtained with the Clampex software  
139 (Molecular Devices, UK). Spontaneous excitatory and inhibitory postsynaptic currents (sEPSCs and  
140 sIPSCs) were recorded from PC by whole-cell patch clamp using borosilicate glass capillaries (Harvard  
141 Apparatus, 1.5 OD x 0.86 ID x 100L) with a resistance of 4-5 M $\Omega$ , filled with the following intracellular  
142 solution in mM: 144 potassium gluconate, 1 MgCl<sub>2</sub>, 10 HEPES, 0.5 EGTA (pH 7.4, 280 mOsm). Cells  
143 with an access resistance  $> 20$  M $\Omega$  at resting potential were excluded from analyses as well as any cell  
144 for which a  $>20$  % change in those parameters occurred during the course of the experiment. PC were  
145 recorded in voltage-clamp mode with a holding potential of -60 mV. Spontaneous inhibitory post-  
146 synaptic currents (sIPSCs) were recorded in the presence of the AMPA receptor antagonist NBQX (10  
147  $\mu\text{M}$ , HelloBio #HB0443) and the NMDA receptor antagonist D-AP5 (50  $\mu\text{M}$ , HelloBio #HB0225) while

148 spontaneous excitatory post-synaptic currents (sEPSCs) were recorded in the presence of the GABA<sub>A</sub>  
149 receptor antagonist gabazine (5  $\mu$ M, HelloBio #HB0901). Spontaneous currents were analyzed with  
150 Easy Electrophysiology software (Easy Electrophysiology Ltd, UK).

151 Pharmacological block of noradrenergic receptors was obtained by the application of antagonists  
152 prazosin ( $\alpha$ 1, Merck #P7791-50MG, 30  $\mu$ M), propranolol ( $\beta$ , Merck # P0884-1G, 10  $\mu$ M), and  
153 phentolamine ( $\alpha$ , Merck # P7547-100MG, 30  $\mu$ M). For experiments with mice expressing DREADD,  
154 clozapine N-oxyde (CNO, Sigma-Aldrich #SML2304, 10  $\mu$ M) was added to the bath solution.

155 In experiments using mice injected with AAV8-Pcp2-hM3Dq-mCherry, in order to confirm that patch  
156 clamped PC also expressed the excitatory DREADD, biocytin (7mg/mL, HelloBio #HB5035) was added  
157 to the intrapipette solution and slices were post-fixed overnight in 4% PFA. Slices were then washed  
158 and permeabilized before incubation with streptavidin conjugated-488 (ThermoFischer #S32354, 1/500)  
159 for 1h45. Post hoc confocal images (Leica SP8) of biocytin-filled PC and virally induced expression of  
160 mCherry were acquired to verify their colocalization.

161

## 162 Two-photon imaging

### 163 *Acquisition*

164 Ex vivo imaging of cerebellar slices were performed under a two-photon microscope (Femtonics,  
165 Budapest) equipped with an 8 kHz resonant scanner combined with a pulse laser (MaiTai-DS,  
166 SpectraPhysics, Santa Clara, CA, USA) tuned at 920 nm (green) or 1020 nm (red). Slices were  
167 continuously perfused with oxygenated ACSF (in mM: 110 NaCl, 5 KCl, 2.5 CaCl<sub>2</sub>, 1.5 MgSO<sub>4</sub>, 1.24  
168 KH<sub>2</sub>PO<sub>4</sub>, 10 D-glucose, 27.4 NaHCO<sub>3</sub>) and heated at 30-32°C using an automatic temperature controller  
169 (TC-324B, Warner Instruments). Images were acquired at 31.1 Hz. Typical imaging protocol consisted  
170 in ten minutes of baseline recording followed by fifteen minutes of treatment (e.g. CNO). For evoked  
171 NE-release, a stimulating electrode (borosilicate glass capillary from Phymep (1.5 OD x 0.86 ID x 100L)  
172 2-3 M $\Omega$ ) filled with ACSF was positioned in the molecular layer of the cerebellar cortex. Stimulation  
173 was delivered using a DS2A voltage stimulator - Mk.II (Digitimer) under software control, as a single  
174 train of 20 Hz. One stimulation was acquired prior to any treatment (baseline) and CNO was bath applied  
175 for 15 min before another train of stimulation without changing the position of the stimulating electrode.  
176 Calibration-curve protocols were acquired as followed: NE or DA was applied in increasing  
177 concentrations (in  $\mu$ M): 0, 0.01, 0.1, 0.25, 0.5, 1, for 3 min per concentration.

178

### 179 *Analysis*

180 Videos were exported in AVI format and averaged at 9 frames per second to reduce noise and  
181 improve signal quality. Analysis was performed using a custom-built Python pipeline called DETECT  
182 (Dynamic Extraction and Tracking of Emitted Cellular Transients)<sup>3</sup>, specifically designed for an  
183 automatic, GMM-based (Gaussian Mixture Model) detection of spontaneous NE or GCaMP signals  
184 depending on the experiment. This pipeline identifies individual fluorescence clusters while correcting  
185 for background noise and motion correction. Following detection, we used TrackMate in Fiji (ImageJ)  
186 to extract a range of spatiotemporal features from each identified cluster, including area, perimeter, mean  
187 intensity, total number of events, and directionality of propagation. The resulting csv files were further  
188 processed and analyzed in MATLAB using custom-written scripts for group-level statistical  
189 comparisons and visualization. For evoked NE-release, videos were exported and treated in the same  
190 way, and stimulation response area and intensity was quantified with a custom-built matlab code.  
191 Calibration-curve data were extracted as above and analyzed with a custom-built python code where  
192 fluorescence movies were processed frame-by-frame. For each frame, the mean fluorescence of non-  
193 zero pixels was calculated to exclude static background, and  $\Delta F/F$  was computed using the first 60 s of  
194 the drug-free period as  $F_0$  to minimize bleaching effects. Traces were **smoothed** with a centered moving  
195 average. Pharmacological responses were quantified by fitting  $\Delta F/F$  time courses with a four-parameter  
196 logistic model using nonlinear least-squares regression. Fits typically achieved R<sup>2</sup> values of ~0.92, and

197 parameter stability was confirmed by sensitivity analyses with 5% added noise. Baseline values were  
198 estimated over a 180 seconds pre-stimulation period.

## 199 Behavioral experiments

### 200 *Treadmill-based locomotion assessment*

201 To assess forced locomotion, WT and aVMAT2cKO mice were tested on a 5-lane treadmill  
202 (#8710RTS Panlab Harvard Apparatus). Both groups, WT and aVMAT2cKO mice, underwent the  
203 tamoxifen injections procedure. Each treadmill lane measured 532 mm in length, 100 mm in width and  
204 50 mm in height. The treadmill was equipped with a control unit (LE8700TS Treadmill Control Unit,  
205 Panlab Harvard Apparatus) that allowed precise adjustment of speed parameters. The protocol, adapted  
206 from <sup>4</sup>, starts with a stationary period (0 cm/s) for 1 minute, followed by an initial acceleration to 10  
207 cm/s over 30 seconds. Mice were then maintained at 10 cm/s for three intervals: from 1.5 to 2 minutes,  
208 3 to 4 minutes, and 5 to 6 minutes, each separated by 1 minute rest phases (0 cm/s). At 7 minutes, the  
209 speed was increased to 20 cm/s for 1 minute. The total duration of the protocol was 8 minutes.

210

### 211 *Horizontal ladder test*

212 To assess skilled locomotion and sensorimotor coordination, WT and aVMAT2cKO mice were  
213 subjected to the ladder rung walking test as previously described <sup>5</sup>. Both groups, WT and aVMAT2cKO  
214 mice, underwent the tamoxifen injections procedure. The apparatus consisted of two transparent  
215 plexiglass side walls (100 cm long, 20 cm high) and evenly spaced metal rungs (1 cm apart) forming a  
216 ladder elevated approximately 1 meter above the ground. Irregular sessions consisted of irregular  
217 spacing by randomly removing rungs in order to prevent pattern learning and challenge motor  
218 coordination. Each regular and irregular session consisted of 3 trials each. For irregular sessions, 3  
219 random patterns were created and maintained identical for each mouse. Mice were familiarized to the  
220 task by performing 3 regular sessions prior to the tests. The following day, mice were tested with 3  
221 regular sessions and 3 irregular sessions. They were placed at one end of the ladder and allowed to  
222 traverse to their home cage located at the opposite end. Crossings were recorded using a high-speed  
223 camera (200 fps, acA2040-120um, Basler Inc.) integrated into a custom closed-loop system that  
224 automatically adjusted the camera position to precisely track the mice as they traversed the ladder. The  
225 camera was positioned laterally and slightly inclined to capture precise paw movements. Videos were  
226 analyzed frame-by-frame (MPC software) to evaluate forelimb and hindlimb placements using a 7-  
227 points foot fault scoring system <sup>5</sup>:

- 228 - 0: correct placement
- 229 - 1: partial placement, paw is misplaced with only toes or heels
- 230 - 2: correction, paw aims for one rung but is placed on another without touching the first
- 231 - 3: replacement, paw position is adjusted after first initial placement
- 232 - 4: slight slip without fall
- 233 - 5: deep slip, paw slips leading to imbalance and fall
- 234 - 6: total miss, paw misses the rung leading to a fall.

235 For analysis, errors were expressed as a percentage of total steps to account for potential differences in  
236 step count across trials. The total number of errors per session and the corresponding error score intensity  
237 were measured.

238

### 239 GRAB<sub>NE2h</sub> miniscope imaging

240 To control for potential bias from the surgery or miniscope attachment on motor performances, mice  
241 performed the treadmill and horizontal ladder protocol before and after surgery for GRAB<sub>NE2h</sub> imaging.  
242 Imaging acquisition during the task was performed using the nVista miniscope system (Inscopix), fixed  
243 on the surgically implanted baseplate, with a 20 frames per second acquisition rate. Raw signals were  
244 then processed in Inscopix Data Processing Software as followed: after motion correction, regions of

245 interest (ROIs) were manually defined based on signal quality while avoiding blood vessels, using the  
246 same ROI size across videos.  $\Delta F/F$  traces were then extracted and normalized for each ROI by their root  
247 mean square, and aligned to the behavioral videos for correlation analyses. Correlation analyses, power  
248 spectral density estimates, and statistical tests were performed in MATLAB.

249

## 250 Statistics

251 All data were analyzed using GraphPad Prism, MATLAB, and Python. Data normality was assessed  
252 using the Shapiro-Wilk test. Outliers were identified using the Robust Regression and Outlier Removal  
253 (ROUT) method ( $Q = 1\%$ )<sup>6</sup> implemented in GraphPad Prism, which controls the false discovery rate,  
254 and were removed prior to statistical analysis. For comparisons between two groups, two-tailed paired  
255 or unpaired Student's t tests were used when data were normally distributed. Otherwise, the Wilcoxon  
256 signed-rank test (paired) or Mann-Whitney U test (unpaired) was applied. One- or two-way ANOVA,  
257 including repeated-measures designs where appropriate, were used, followed by post hoc multiple-  
258 comparison tests using Tukey's or Sidak's methods as appropriate. All data are reported as mean  $\pm$  SEM.  
259 Statistical significance was set at  $\alpha = 0.05$ . \* $p < 0.05$ , \*\* $p < 0.01$ , \*\*\* $p < 0.001$  and \*\*\*\* $p < 0.0001$ .

260

## 261 **References**

262

- 263 1. Petrelli, F. *et al.* Disruption of Astrocyte-Dependent Dopamine Control in the Developing Medial  
264 Prefrontal Cortex Leads to Excessive Grooming in Mice. *Biol. Psychiatry* **93**, 966–975 (2023).
- 265 2. Petrelli, F. *et al.* Dysfunction of homeostatic control of dopamine by astrocytes in the developing  
266 prefrontal cortex leads to cognitive impairments. *Mol. Psychiatry* **25**, (2020).
- 267 3. Niu, W. *et al.* Sharp and Fast Dynamic Extraction and Tracking of Emitted Cellular Transients. *bioRxiv*  
268 2026.04.16.718018 (2026) doi:10.64898/2026.04.16.718018.
- 269 4. Paukert, M. *et al.* Norepinephrine controls astroglial responsiveness to local circuit activity. *Neuron* **82**,  
270 1263–1270 (2014).
- 271 5. Metz, G. A. & Wishaw, I. Q. The ladder rung walking task: a scoring system and its practical  
272 application. *J. Vis. Exp.* <https://doi.org/10.3791/1204> (2009) doi:10.3791/1204.
- 273 6. Motulsky, H. J. & Brown, R. E. Detecting outliers when fitting data with nonlinear regression - a new  
274 method based on robust nonlinear regression and the false discovery rate. *BMC Bioinformatics* **7**, (2006).

275

276

277

278

279

280

281

282

283

284

285

286

287

288

289

290

291

292

293

294

295

296

297

298

299

300

301

302

## Extended data

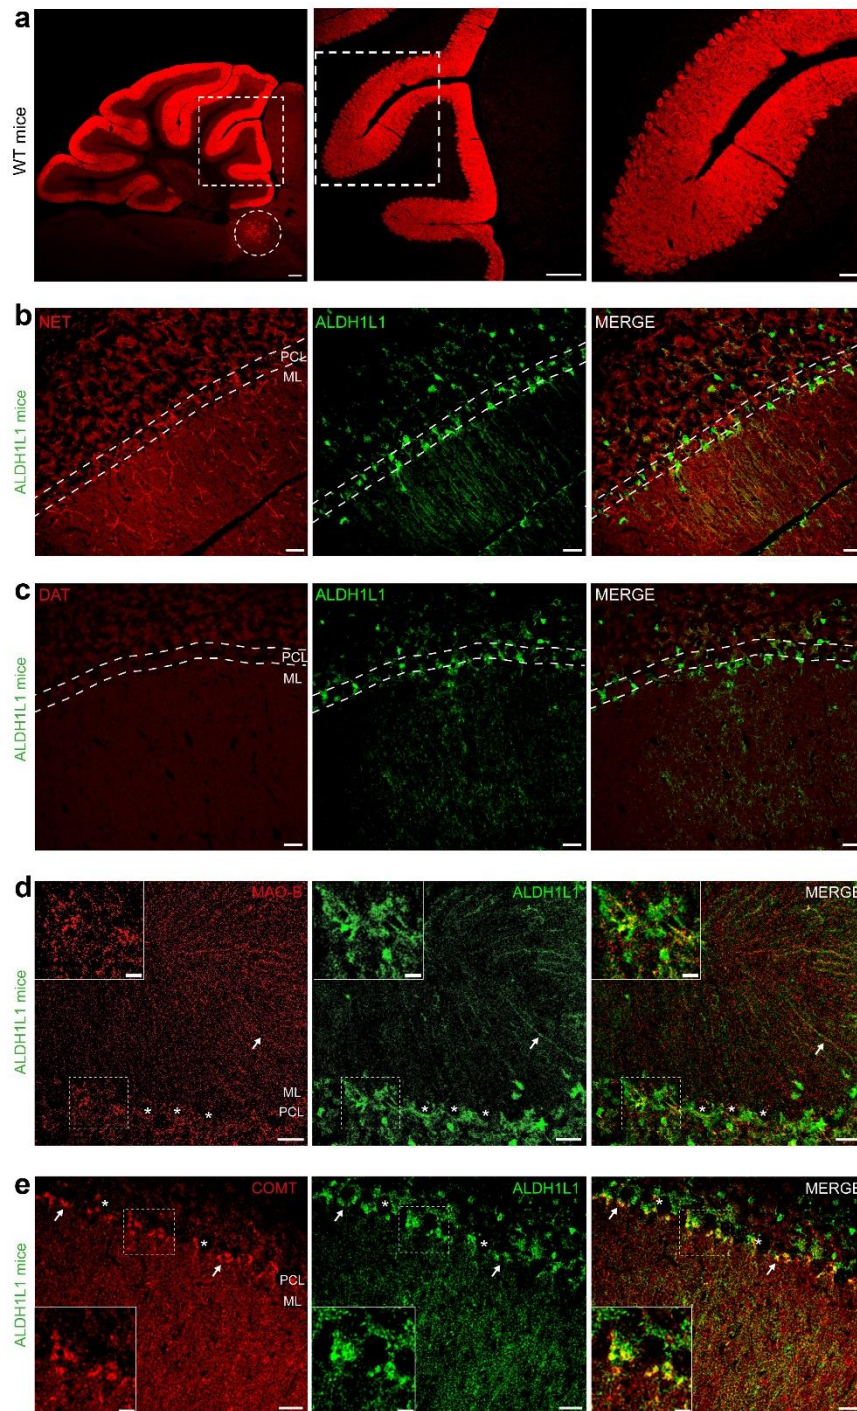

**Figure 1. Monoaminergic signaling components in the cerebellar cortex.** **a.** Tyrosine hydroxylase (TH, red) immunostaining in WT mice showing widespread labeling across cerebellar lobules. Dashed squares indicate regions shown at higher magnification (middle and right panels). The dashed circle highlights TH-positive *locus coeruleus* neurons (n = 8). Scale bar, 100  $\mu$ m. **b.** NET immunostaining (red) in ALDH1L1-eGFP mice (green) showing NET expression restricted to sparse fibers within the molecular layer and absent from Bergmann glia (BG). Scale bar, 25  $\mu$ m (n=4). Dashed lines delineate the Purkinje cell layer (PCL) and molecular layer (ML). **c.** DAT immunostaining (red) in ALDH1L1-eGFP mice (green) showing absence of DAT expression in the cerebellar cortex. Scale bar, 25  $\mu$ m (n=2). Dashed lines delineate the Purkinje cell layer (PCL) and molecular layer (ML). **d.** MAO-B immunostaining (red) in ALDH1L1-eGFP mice (green) showing expression of monoamine degradation enzymes in BG. Insets show higher magnification views. Scale bars, 25  $\mu$ m (main), 10  $\mu$ m (inset) (n=2). **e.** COMT immunostaining (red) in ALDH1L1-eGFP mice (green) confirming expression of monoamine degradation pathways in BG. Insets show higher magnification views. Scale bars, 25  $\mu$ m (main), 10  $\mu$ m (inset) (n=3).



422 **Supplementary video captions**

423

424 **Video 1. Detection of spontaneous NE transients in the cerebellar cortex.** Left: Raw two-photon  
425 GRAB<sub>NE2h</sub> imaging showing spontaneous NE transients. Middle: Background removal using our custom  
426 pipeline (DETECT) (10), isolating spontaneous NE transients. Right: Detection and segmentation of NE  
427 transients for quantitative analysis. Scale bar, 25  $\mu$ m. Displayed at 20x real-time speed.

428

429 **Video 2. Extracellular Ca<sup>2+</sup> removal abolishes spontaneous NE release.** Left: Two-photon GRAB<sub>NE2h</sub>  
430 imaging of spontaneous NE transients under baseline conditions. Right: Two-photon imaging of  
431 spontaneous NE transients after extracellular Ca<sup>2+</sup> removal. Scale bar, 25  $\mu$ m. Displayed at 20x real-  
432 time speed.

433

434 **Video 3. Chemogenetic silencing of LC noradrenergic neurons suppresses evoked NE transients**  
435 **in the cerebellar cortex.** Left: Two-photon GRAB<sub>NE2h</sub> imaging of electrically evoked NE release in  
436 the molecular layer under baseline conditions. Right: Electrical stimulation after hM4Di chemogenetic  
437 silencing of LC noradrenergic neurons with CNO (10  $\mu$ M, 30 min), showing suppression of evoked NE  
438 transients. Scale bar, 25  $\mu$ m. Displayed at 20x real-time speed.

439

440 **Video 4. Chemogenetic silencing of LC noradrenergic neurons does not abolish spontaneous NE**  
441 **release.** Left: Two-photon GRAB<sub>NE2h</sub> imaging of spontaneous NE release under baseline ACSF  
442 conditions. Right: Two-photon GRAB<sub>NE2h</sub> imaging following chemogenetic silencing of LC  
443 noradrenergic neurons with CNO (10  $\mu$ M, 30 min), showing persistent spontaneous NE release. Scale  
444 bar, 25  $\mu$ m. Displayed at 20x real-time speed.

445

446 **Video 5. Chemogenetic activation of Bergmann glia increases spontaneous NE release.** Left: Two-  
447 photon GRAB<sub>NE2h</sub> imaging of spontaneous NE transients under baseline ACSF conditions. Right: Two-  
448 photon GRAB<sub>NE2h</sub> imaging during hM3Dq chemogenetic activation of Bergmann glia with CNO (10  
449  $\mu$ M), showing increased spontaneous NE transients. Scale bar, 25 $\mu$ m. Displayed at 20x real-time speed.

450

451 **Video 6. Chemogenetic activation increases astroglial Ca<sup>2+</sup> dynamics.** Left: Two-photon GCaMP6f  
452 imaging of Bergmann glia Ca<sup>2+</sup> transients under baseline ACSF conditions. Right: Two-photon  
453 GCaMP6f imaging during astroglial hM3Dq chemogenetic activation with CNO (10  $\mu$ M), showing  
454 increased astroglial Ca<sup>2+</sup> dynamics. Scale bar, 25  $\mu$ m. Displayed at 5x real-time speed.

455

456 **Video 7. Disruption of astroglial Ca<sup>2+</sup> signaling reduces spontaneous NE transients and suppresses**  
457 **hM3Dq-induced increases in spontaneous NE release.** Left: Two-photon GRAB<sub>NE2h</sub> imaging of  
458 spontaneous NE release under baseline ACSF conditions in mice expressing the calcium extruder CalEx  
459 in astroglial cells. Right: Two-photon GRAB<sub>NE2h</sub> imaging during chemogenetic activation of Bergmann  
460 glia with CNO (10  $\mu$ M) in mice expressing CalEx in astroglial cells, showing suppression of the hM3Dq-  
461 induced increase in spontaneous NE release. Scale bar, 25  $\mu$ m. Displayed at 20x real-time speed.

462

463 **Video 8. CalEx suppresses astroglial Ca<sup>2+</sup> dynamics during chemogenetic activation.** Left: Two-  
464 photon GCaMP6f imaging of astroglial Ca<sup>2+</sup> transients under baseline ACSF conditions in mice  
465 expressing the calcium extruder CalEx in cerebellar cortex astrocytes. Right: Two-photon GCaMP6f  
466 imaging during chemogenetic activation of Bergmann glia with CNO (10  $\mu$ M) in mice expressing CalEx  
467 in astrocytes, showing reduced Bergmann glia Ca<sup>2+</sup> dynamics. Scale bar, 25  $\mu$ m. Displayed at 5x real-  
468 time speed.

469

470 **Video 9. aVMAT2cKO mice show impaired motor coordination during the horizontal ladder task.**  
471 Top: WT mouse performing the horizontal ladder task under irregular conditions. Bottom:  
472 aVMAT2cKO mouse performing the same task, showing increased fine and strong stepping errors.  
473 Displayed at 1x real-time speed.

474
